# Supplementary material
Source: HighWire-hosted journal article supplement (http://www.jrheum.org/highwire/filestream/29743/field_highwire_adjunct_files/0/150224DataSuppl.pdf)
Supplement: 150224DataSuppl.pdf [file 150224DataSuppl.pdf]

## ONLINE SUPPLEMENTARY DATA

**Supplementary Figure 1.** Forest plot of the effect of the body mass index (overweight and obesity > 25 kg/m<sup>2</sup> versus normal weight 18.5–25 or 20–25 kg/m<sup>2</sup>) on Disease Activity Score in 28 joints.

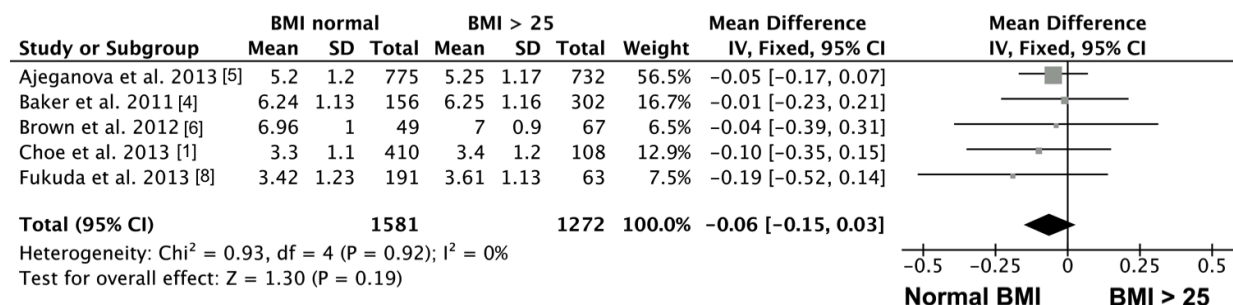

**Supplementary Figure 2.** Forest plot of the effect of the body mass index (overweight and obesity > 25 kg/m<sup>2</sup> versus normal weight 18.5–25 or 20–25 kg/m<sup>2</sup>) on Health Assessment Questionnaire score.

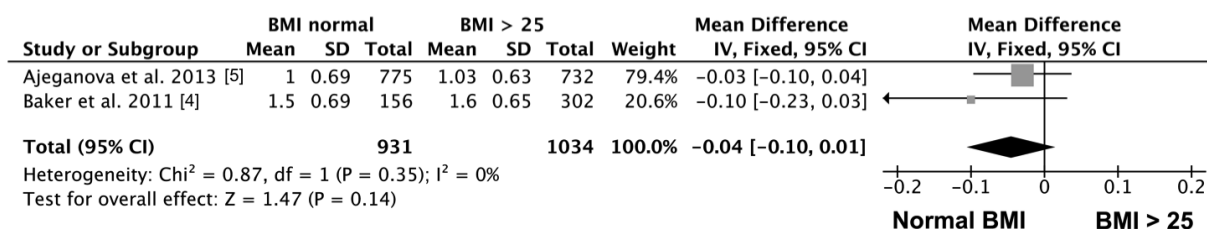

**Supplementary Figure 3.** Forest plot of the effect of the body mass index (overweight and obesity ≥ 25 kg/m<sup>2</sup> versus normal weight < 25 kg/m<sup>2</sup>) on radiographic joint damage (standardized means).

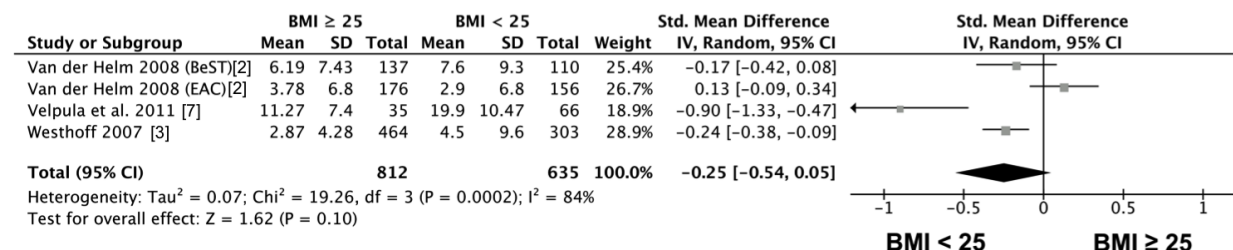

**Supplementary Figure 4.** Funnel plot of publication bias for (A) Disease Activity Score in 28 joints (DAS28) and (B) radiographic joint damage by Egger test.

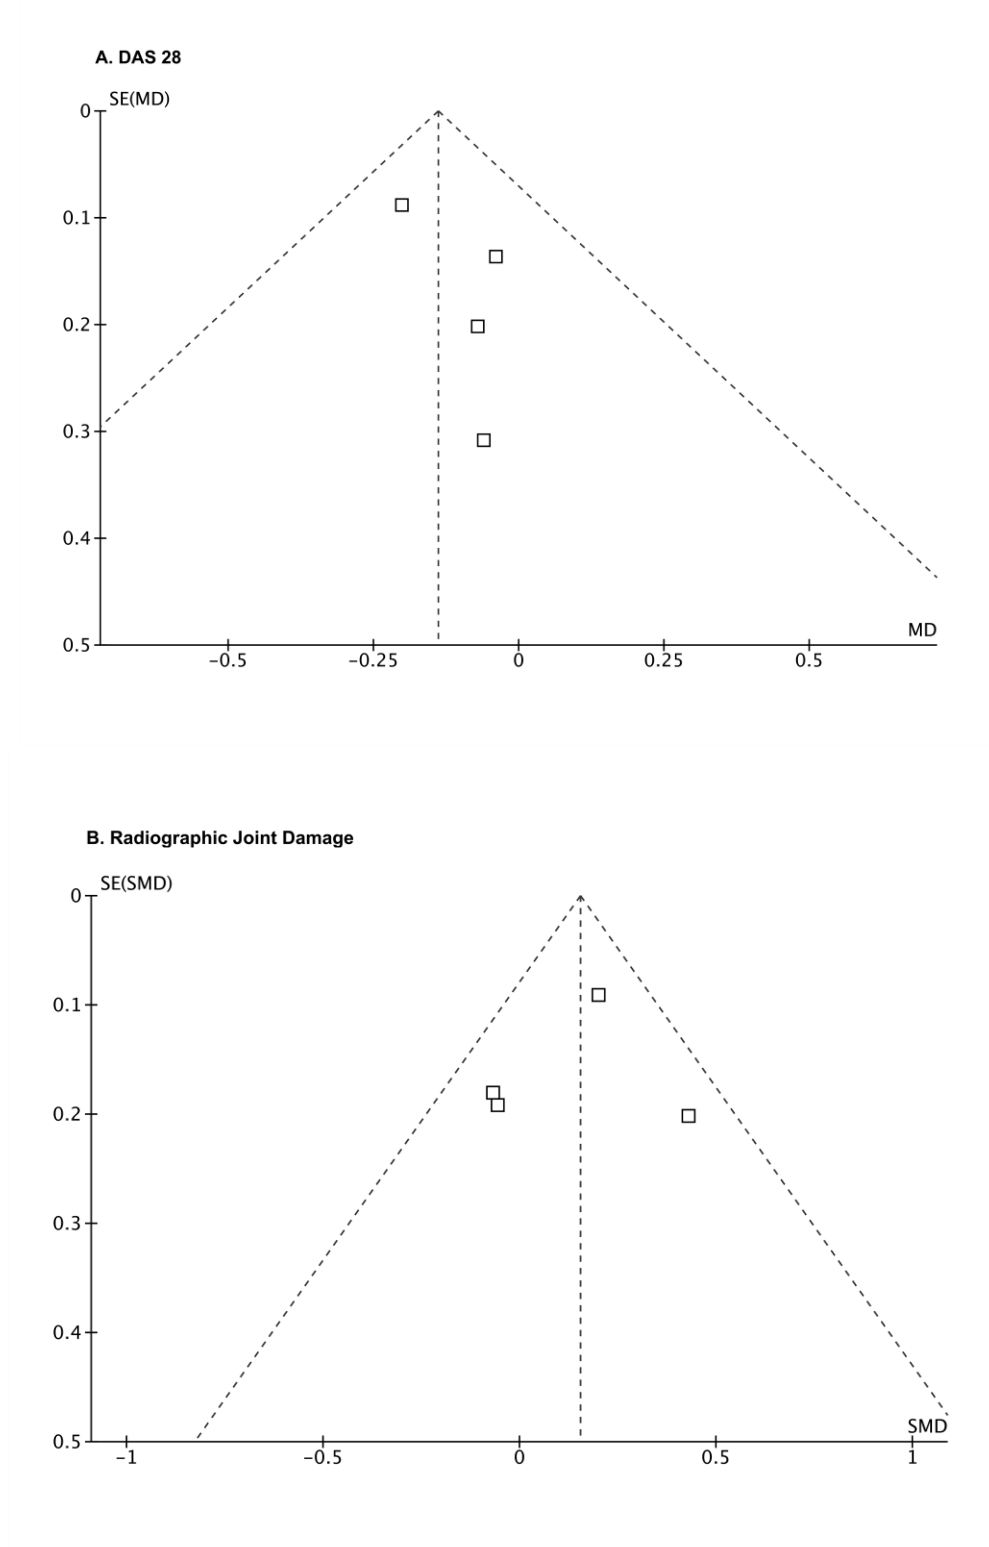

## References

1. Choe J-Y, Bae J, Lee H, Park S-H, Kim S-K. Lack association of body mass index with disease activity composites of rheumatoid arthritis in Korean population: cross-sectional observation. *Clin Rheumatol* 2014;33:485-92 (online 2013)
2. Van der Helm-van Mil AHM, van der Kooij SM, Allaart CF, Toes REM, Huizinga TWJ. A high body mass index has a protective effect on the amount of joint destruction in small joints in early rheumatoid arthritis. *Ann Rheum Dis* 2008;67:769-74.
3. Westhoff G, Rau R, Zink A. Radiographic joint damage in early rheumatoid arthritis is highly dependent on body mass index. *Arthritis Rheum* 2007;56:3575-82.
4. Baker JF, George M, Baker DG, Toedter G, Von Feldt JM, Leonard MB. Associations between body mass, radiographic joint damage, adipokines and risk factors for bone loss in rheumatoid arthritis. *Rheumatology (Oxford)* 2011;50:2100-7.
5. Ajeganova S, Andersson ML, Hafström I, for the BARFOT Study Group. Association of obesity with worse disease severity in rheumatoid arthritis as well as with comorbidities: A long-term followup from disease onset. *Arthritis Care Res (Hoboken)* 2013;65:78-87.
6. Brown RA, Spina D, Butt S, Summers GD. Long-term effects of anti-tumour necrosis factor therapy on weight in patients with rheumatoid arthritis. *Clin Rheumatol* 2012;31:455-61.
35. Fukuda W, Omoto A, Ohta T, Majima S, Kimura T, Tanaka T, et al. Low body mass index is associated with impaired quality of life in patients with rheumatoid arthritis. *Int J Rheum Dis* 2013;16:297-302.
7. Velpula UD, Agrawal S, Thomas J, Prabu VN, Rajasekhar L, Narsimulu G. Low body mass index is adversely associated with radiographic joint damage in Indian patients with early rheumatoid arthritis. *J Rheumatol* 2011;38:434-8.
8. Fukuda W, Omoto A, Ohta T, Majima S, Kimura T, Tanaka T, et al. Low body mass index is associated with impaired quality of life in patients with rheumatoid arthritis. *Int J Rheum Dis* 2013;16:297-302.
